1 **High-intensity interval training blunts exercise-induced changes in markers of mitochondrial biogenesis**  
2 **in human skeletal muscle**

3 Cesare Granata<sup>1,2,\*</sup>, Rodrigo S.F. Oliveira<sup>1</sup>, Jonathan P. Little<sup>3</sup> and David J. Bishop<sup>1,4</sup>,

4 <sup>1</sup>Institute for Health and Sport, Victoria University, Melbourne, VIC, Australia

5 <sup>2</sup>Department of Diabetes, Central Clinical School, Monash University, Melbourne, VIC, Australia

6 <sup>3</sup>School of Health and Exercise Sciences, University of British Columbia Okanagan, Kelowna, BC, Canada

7 <sup>4</sup>School of Medical and Health Sciences, Edith Cowan University, Joondalup, WA, Australia.

8 **\*Corresponding author:** Cesare Granata, Department of Diabetes, Central Clinical School, Faculty of  
9 Medicine, Nursing and Health Sciences, Monash University, Alfred Centre, 99 Commercial Rd, Melbourne,  
10 3004, VIC, Australia. Tel: +61 3 99030531; Email: [cesare.granata@monash.edu](mailto:cesare.granata@monash.edu)

11 **Short title:** Blunted mitochondrial adaptations post training

## 12 **Abbreviations**

13 20k-TT, 20-km cycling time trial; ACC, acetyl-CoA carboxylase; ACTB,  $\beta$ -actin; B2M, beta-2-  
14 microglobulin; BM, body mass; *cyt c*, cytochrome *c*; GAPDH, glyceraldehyde 3-phosphate dehydrogenase;  
15 GXT, graded exercise test; HIIE, high-intensity interval exercise; HIIT, high-intensity interval training; HVT,  
16 high-volume training; LDHA, lactate dehydrogenase A; NRF1, nuclear respiratory factor 1; NRF2, nuclear  
17 respiratory factor 2; NVT, normal-volume training; PGC-1 $\alpha$ , peroxisome proliferator-activated receptor  $\gamma$   
18 coactivator-1 $\alpha$ ; PHF20, plant homeodomain finger-containing protein 20; TBP, TATA-binding protein;  
19 TFAM, mitochondrial transcription factor A;  $\dot{V}O_{2\text{Peak}}$ , peak oxygen uptake;  $\dot{W}_{\text{LT}}$ , power at the lactate  
20 threshold;  $\dot{W}_{\text{peak}}$ , peak power output.

21 **ABSTRACT**

22 Exercise-induced increases in peroxisome proliferator-activated receptor  $\gamma$  coactivator-1 $\alpha$  (PGC-1 $\alpha$ ) and p53  
23 protein content in the nucleus mediate the initial phase of exercise-induced mitochondrial biogenesis. Here we  
24 investigated if these exercise-induced increases were maintained when repeating a high-intensity interval  
25 exercise (HIIE) session performed at the same absolute exercise intensity before and after 40 sessions of  
26 twice-daily high-volume high-intensity interval training (HVT) (Pre-HVT and Post-HVT, respectively).  
27 Vastus lateralis muscle biopsies were collected from 10 healthy participants before, immediately post, and 3h  
28 after the HIIE sessions. Protein contents of select markers of exercise-induced mitochondrial biogenesis were  
29 assessed in nuclear- and cytosolic-enriched fractions by immunoblotting; mRNA contents of key transcription  
30 factors and mitochondrial genes were assessed by qPCR. Despite exercise-induced increases in PGC-1 $\alpha$ , p53,  
31 and plant homeodomain finger-containing protein 20 (PHF20) protein content, the phosphorylation of p53 and  
32 acetyl-CoA carboxylase (p-p53<sup>Ser15</sup> and p-ACC<sup>Ser79</sup>, respectively), and PGC-1 $\alpha$  mRNA Pre-HVT, no  
33 significant changes were observed Post-HVT. Forty sessions of twice-daily high-intensity interval training  
34 blunts exercise-induced molecular changes regulating the early events of mitochondrial biogenesis observed  
35 Pre-HVT. Future studies should determine if this loss relates to the decrease in relative exercise intensity,  
36 habituation to the same exercise stimulus, or a combination of both.

37 **Keywords:** endurance exercise, HIIT, mitochondrial adaptations, p53, PGC-1 $\alpha$

## 38 **Introduction**

39 Mitochondria are responsible for the production of the majority of the energy required to sustain daily  
40 activities and are key regulator of energy homeostasis (1). The importance of mitochondria is underlined by  
41 the links between a healthy mitochondrial pool and enhanced endurance performance (2), improved health (3)  
42 and a reduced risk of several lifestyle-related chronic diseases (4, 5). Exercise has long been known to induce  
43 mitochondrial biogenesis (6) - the making of new components of the mitochondrial reticulum (7). However,  
44 despite the current knowledge on this topic (8-10), more research is required to better understand the  
45 molecular mechanisms mediating exercise-induced mitochondrial adaptations.

46 A key regulator of exercise-induced mitochondrial biogenesis is peroxisome proliferator-activated receptor  $\gamma$   
47 coactivator-1 $\alpha$  (PGC-1 $\alpha$ ) (11). In both rat (12) and human (13-16) skeletal muscle it has been observed that  
48 there is a post-exercise increase of PGC-1 $\alpha$  protein content in the nucleus, where PGC-1 $\alpha$  performs its  
49 transcriptional activity (17). In addition, the PGC-1 $\alpha$  protein itself (18), as well as other proteins (e.g., p53  
50 (19)), contribute to the exercise-induced upregulation of PGC-1 $\alpha$  mRNA (20). However, this exercise-induced  
51 increase in PGC-1 $\alpha$  mRNA appears to be reduced as a training intervention progresses (21-23). While this  
52 suggests the exercise-induced increase of PGC-1 $\alpha$  protein in the nucleus may also be reduced after a short  
53 training intervention, no study has investigated exercise-induced changes in the content of nuclear proteins  
54 before and after a training intervention. Given that increased PGC-1 $\alpha$  protein content in the nucleus represents  
55 an important process that contributes to the initial phase of exercise-induced mitochondrial biogenesis (12), it  
56 is important to better understand how the molecular response to exercise changes with training.

57 p53 is another important regulator of exercise-induced mitochondrial biogenesis in human skeletal muscle  
58 (24). Nuclear accumulation of p53 protein has been reported immediately (13), or 3 hours (25), after a single  
59 session of exercise. While the mechanisms underlying the nuclear accumulation of p53 are complex (26, 27),  
60 they have partly been attributed to phosphorylation of p53 at serine 15 (p-p53<sup>Ser15</sup>) (27) - a posttranslational  
61 modification that enhances p53 protein stability (28) and prevents its nuclear export and cytosolic degradation  
62 (27, 29). However, once again, these molecular events have only been investigated following a single exercise  
63 session, and it is not known if they are altered by training. Given that the majority of the p53 activity takes  
64 place in the nucleus (27), it is important to determine if the early events of the p53-mediated exercise-induced  
65 mitochondrial biogenesis are differentially regulated in this subcellular compartment as the training  
66 intervention progresses.

67 To maintain the effectiveness of exercise to stimulate mitochondrial biogenesis, it is important to understand  
68 the molecular signals that are altered when an exercise stimulus is repeated. Therefore, the aim of our study  
69 was to investigate if a session of high-intensity interval exercise (HIIE), performed at the same absolute  
70 workload before and after a period of high-volume training (HVT; 40 sessions of high-intensity interval  
71 training [HIIT] performed twice-daily for 20 consecutive days), induces similar increases in the protein  
72 content of PGC-1 $\alpha$ , p53, and p-p53<sup>Ser15</sup> in the nucleus. Upstream signaling, as well as mRNA content of  
73 several genes involved in exercise-induced mitochondrial biogenesis, were also investigated before and after  
74 HVT. We hypothesized that 40 sessions of HIIT would result in significantly reduced exercise-induced  
75 increases in these events mediating exercise-induced mitochondrial biogenesis.

## 76 **Materials and methods**

### 77 *Participants*

78 Ten healthy men ( $20 \pm 2$  y;  $180 \pm 12$  cm;  $80 \pm 15$  kg;  $46.2 \pm 7.6$  mL  $\cdot$  min<sup>-1</sup>  $\cdot$  kg<sup>-1</sup>), who were not regularly  
79 engaged in cycling-based sports, were moderately-trained (i.e., undertaking moderate, unstructured aerobic  
80 activity for less than 3 to 4 hours per week for at least 6 months prior to the study), and were non-smokers and  
81 free of medications, volunteered to participate in this study. Upon passing an initial medical screening  
82 participants were informed of the study requirements, risks, and benefits, before giving written informed  
83 consent. All experimental protocols and study's procedures were approved by the Victoria University Human  
84 Research Ethics Committee and conformed to the standards set by the latest revision of the Declaration of  
85 Helsinki. All participants completed the study; however, due to the limited amount of muscle tissue harvested  
86 during the second biopsy trial, data from one participant were excluded (including physiological and  
87 performance data).

### 88 *Study design and testing*

89 This research was part of a larger, previously-published study investigating the effect of different training  
90 volumes on mitochondrial adaptations (30). The experimental protocol specific to the portion of the study  
91 described in this manuscript consisted of three tests, each separated by 48 to 72 hours, repeated before and  
92 after the HVT: a 20-km cycling time trial (20k-TT), a graded exercise test (GXT) and a HIIE biopsy trial (Pre-  
93 HVT and Post-HVT). During the 20 days of HVT participants performed HIIT twice a day (Figure 1). Prior to  
94 beginning this phase of the larger study, participants were familiarized with the 20k-TT, the GXT and the  
95 HIIE, and completed the normal volume training (NVT) phase, (12 HIIT sessions in 4 weeks; Figure 1). It has

96 been reported that the transcriptional response to the first session of exercise is reflective of muscle damage  
97 (31) and can differ significantly from the response to subsequent exercise sessions (22). Thus, the NVT phase  
98 served to habituate participants to the exercise stimulus. Participants were required to refrain from vigorous  
99 exercise for the 72 h preceding each test, from alcohol and any exercise for 24 h before testing, and from food  
100 and caffeine consumption for 3 h before each test.

101 *20k-TT*. Cycling time trials were performed on an electronically-braked cycle ergometer (Velotron,  
102 RacerMate, USA) after a 6-min warm-up were participants cycled for 4 min at 66% of the power attained at  
103 the lactate threshold ( $\dot{W}_{LT}$ ), followed by 2 min at  $\dot{W}_{LT}$ , and 2 min of rest. During these tests, participants were  
104 only allowed access to cadence and completed distance. Heart rate was monitored (Polar-Electro, Finland)  
105 during all exercise trials and training sessions.

106 *GXT*. A discontinuous graded exercise test was performed on an electronically-braked cycle ergometer (Lode  
107 Excalibur, v2.0, The Netherlands) to determine peak oxygen uptake ( $\dot{V}O_{2peak}$ ), peak power ( $\dot{W}_{peak}$ ), and  $\dot{W}_{LT}$   
108 (using the modified  $D_{max}$  method (32)), and the exercise intensity for both the biopsy trial and the HVT  
109 training sessions, as previously described (33). Briefly, the test began at 60, 90, or 120 W, depending on  
110 participants' fitness levels, and was increased by 30 W every 4 min. Stages were interspersed with 30-s breaks  
111 for measurement of fingertip capillary blood lactate concentration using a pre-calibrated blood-lactate  
112 analyzer (YSI 2300 STAT Plus, YSI, USA). Participants were instructed to keep a cadence above 60 rpm and  
113 were only allowed access to cadence and elapsed time; the GXT was terminated when participants reached  
114 volitional exhaustion or cadence dropped below 60 rpm. The  $\dot{W}_{peak}$  was determined as the power of the last  
115 completed stage plus 7.5 W for every additional minute completed.  $O_2$  and  $CO_2$  concentrations were analyzed  
116 from expired air using a pre-calibrated gas analyzer (Moxus 2010, AEI technologies, USA), and  $\dot{V}O_2$  values  
117 were recorded every 15 s. The average of the two highest consecutive 15-s values was recorded as a  
118 participant's  $\dot{V}O_{2peak}$ . The same GXT was performed after 20 days of training to determine the relative  
119 exercise intensity of the Post-HVT biopsy trial.

120 *Pre- and Post-HVT HIIE biopsy trials*. Each participant performed the two biopsy trials in the morning and at  
121 the same time, to avoid variations caused by circadian rhythms. Participants were provided with a  
122 standardized dinner ( $55 \text{ kJ} \cdot \text{kg}^{-1}$  body mass (BM), providing  $2.1 \text{ g carbohydrate} \cdot \text{kg}^{-1}$  BM,  $0.3 \text{ g fat} \cdot \text{kg}^{-1}$  BM,  
123 and  $0.6 \text{ g protein} \cdot \text{kg}^{-1}$  BM) and breakfast ( $41 \text{ kJ} \cdot \text{kg}^{-1}$  BM, providing  $1.8 \text{ g carbohydrate} \cdot \text{kg}^{-1}$  BM,  $0.2 \text{ g fat} \cdot \text{kg}^{-1}$   
124  $\text{BM}$ , and  $0.3 \text{ g protein} \cdot \text{kg}^{-1}$  BM) to minimize variability in muscle gene and protein expression attributable  
125 to diet, as previously described (30). While participants rested in the supine position, and after injection of

126 local anesthetic (1% xylocaine) into the skin and fascia of the vastus lateralis muscle, three small incisions  
127 were made about 2-3 cm apart. A resting muscle biopsy was taken (Rest) using a biopsy needle with suction.  
128 Approximately ten minutes after participants were helped to an electronically-braked cycle ergometer  
129 (Velotron, RacerMate, USA) and began a warm up consisting of cycling for four minutes at 66% of  $\dot{W}_{LT}$ ,  
130 followed by 2 min at  $\dot{W}_{LT}$ , and 2 min of rest, after which the Pre-HVT HIIE session began. HIIE consisted of  
131 five 4-min intervals at an exercise intensity equal to  $\dot{W}_{LT} + 0.2 (\dot{W}_{peak} - \dot{W}_{LT})$ , interspersed with two minutes  
132 of recovery at 60 W. Immediately after termination of HIIE (~5 to 10 s) a second skeletal muscle biopsy was  
133 taken (+0 h), while a third one was obtained after three hours of recovery (+3 h), during which time  
134 participants were allowed access to water *ab libitum* and had no access to food. Skeletal muscle samples were  
135 rapidly cleaned of excess blood, fat, and connective tissue, were snap frozen in liquid nitrogen, and later  
136 stored at -80°C for subsequent analyses. By design, the Post-HVT HIIE biopsy trial was performed at the  
137 same absolute exercise intensity used during the Pre-HVT trial, and followed an identical format.

138 *HVT*. The day following the Pre-HVT HIIE biopsy trial participants began HIIT twice a day for 20  
139 consecutive days. Training sessions were performed in the morning and afternoon and consisted of either five  
140 to twelve 4-min intervals at relative exercise intensities ranging from  $\dot{W}_{LT} + 0.3 (\dot{W}_{peak} - \dot{W}_{LT})$  to  $\dot{W}_{LT} + 0.8$   
141  $(\dot{W}_{peak} - \dot{W}_{LT})$ , interspersed with a 2-min recovery at 60 W, or eight to twenty-two 2-min intervals at relative  
142 exercise intensities ranging from  $\dot{W}_{LT} + 0.5 (\dot{W}_{peak} - \dot{W}_{LT})$  to  $\dot{W}_{LT} + 0.8 (\dot{W}_{peak} - \dot{W}_{LT})$ , interspersed with a 1-  
143 min recovery at 60 W (30). Single-session duration increased from 30–35 min to 70–80 min. A 10 km cycling  
144 time trial was performed before, and at regular weekly intervals during, the HVT to monitor participants for  
145 signs of overreaching, as previously described (30). If performance would have decreased by more than 10%,  
146 the training load would have been reduced to prevent overreaching (34). No participants experienced a  
147 performance loss throughout the entire study, and the training protocol was completed as planned. All  
148 participants completed a minimum of 36 (equivalent to 90%) training sessions; average compliance was  
149 96.5% of the prescribed number of sessions.

150

### 151 *Skeletal muscle analyses*

152 *Subcellular fractionation*. Nuclear and cytosolic fractions were prepared from 35 to 50 mg of skeletal muscle  
153 using a commercially-available nuclear extraction kit (NE-PER, Pierce, USA). Briefly, muscle samples were  
154 washed in phosphate-buffered saline (PBS), homogenized in CER-I buffer containing a protease/phosphatase

155 inhibitor cocktail (Cell Signaling Technology [CST], 5872) and centrifuged at ~16,000 g. The supernatant  
156 was taken as the crude cytosolic fraction. The pellets containing nuclei was washed six times in PBS to  
157 minimize cytosolic contamination and nuclear protein were extracted by centrifugation (~16,000 g) in a high-  
158 salt NER buffer supplemented with the same inhibitors cocktail and following the manufacturers' instructions.  
159 Protein concentration was determined in triplicate using a commercial colorimetric assay (Bio-Rad Protein  
160 Assay kit-II; Bio-Rad, Gladesville, NSW, Australia). Nuclear and cytosolic fraction enrichment was  
161 confirmed by blotting the separated fractions against a nuclear (histone H3) and a cytosolic (lactate  
162 dehydrogenase A [LDHA]) protein; histone H3 was mainly detected in nuclear fractions, whereas LDHA was  
163 mainly detected in cytosolic fractions (Figure 2A), indicating the subcellular fractionation enrichment was  
164 successful.

165 *Immunoblotting.* Muscle lysates (10 to 50 µg) were separated by electrophoresis using SDS-PAGE gels (8-  
166 15%) as previously described (13). An internal standard was loaded in each gel, and each lane was normalized  
167 to this value to reduce gel-to-gel variability. Whole-lane Coomassie blue staining (35) was performed to  
168 verify correct loading and equal transfer between lanes (Figure 2B). The following primary antibodies were  
169 used (supplier, catalogue number): histone H3 (CST, 9715), LDHA (CST, 2012), p53 (CST, 2527), p-acetyl-  
170 CoA carboxylase (p-ACC<sup>Ser79</sup>; CST, 3661), PGC-1α (Calbiochem, st-1202), plant homeodomain finger-  
171 containing protein 20 (PHF20; CST, 3934), and p-p53<sup>Ser15</sup> (CST, 9284). Representative images for all target  
172 proteins are presented in Figure 2C.

173 *Total RNA isolation.* Total RNA was isolated from ~15 mg of muscle tissue as previously described (36).  
174 Briefly, samples were homogenized (FastPrep FP120 Homogenizer; Thermo Savant) in the presence of 1 g of  
175 zirconia/silica beads (1.0 mm; Daintree Scientific, St. Helens, TAS, Australia) and 800 µL of TRIzol®  
176 Reagent (Invitrogen, Melbourne, Australia). Lysates were centrifuged at 13,000 rpm for 15 min at 4°C; the  
177 supernatant was collected, combined with chloroform (Sigma-Aldrich, St Louis, USA), and total RNA was  
178 extracted using the TRIzol® protocol as per manufacturer's instructions. RNA precipitation was performed  
179 for at least 2 h at -20°C in the presence of 400 µL of isopropanol and 10 µL of 5 M NaCl (both Sigma-  
180 Aldrich, St Louis, USA). RNA concentration was determined spectrophotometrically (Nanodrop ND1000,  
181 Thermo Fisher Scientific, USA) by measuring the absorbance at 260 (A260) and 280 (A280) nm, with  
182 A260/A280 ratios > 1.8 indicating high-quality RNA (37). To ensure RNA was free of DNA contamination  
183 samples were DNase treated using an RQ1 RNase-free DNase kit (Promega Corporations, Madison, USA).



184 *Real-time PCR (qPCR)*. First-strand cDNA synthesis was performed on 300 ng of total RNA using a thermal  
185 cycler (S1000 Thermal Cycler; Bio-Rad; Bio-Rad, Gladesville, NSW, Australia) and the commercially  
186 available iScript™ cDNA synthesis kit (Bio-Rad, Gladesville, NSW, Australia) in the presence of random  
187 hexamers and oligo(dT)s, according to the manufacturer's directions. Forward and reverse primers for all  
188 genes investigated (Table 1) were designed based on NCBI RefSeq using NCBI Primer-BLAST  
189 ([www.ncbi.nlm.nih.gov/BLAST/](http://www.ncbi.nlm.nih.gov/BLAST/)), and specificity of the amplified product was confirmed by melting point  
190 dissociation curves. The mRNA expression of cytochrome *c* (cyt *c*), nuclear respiratory factor 1 (NRF-1) and  
191 2 (NRF-2), p53, PGC-1 $\alpha$ , PHF20, and mitochondrial transcription factor A (TFAM) were quantified by  
192 quantitative real-time PCR (Mastercycler® RealPlex2, Eppendorf, Germany), using SYBR Green chemistry  
193 (iTaQ™ Universal SYBR® Green Supermix; Bio-Rad, Gladesville, NSW, Australia) (10  $\mu$ L PCR reaction  
194 volume). All samples were run in duplicate simultaneously with template free controls, using an automated  
195 pipetting system (epMotion 5070, Eppendorf, Germany) to reduce technical variation (37). The following  
196 PCR cycling patterns were used: initial denaturation at 95°C (3 min), 40 cycles of 95°C (15 s) and 60°C (60  
197 s). Relative changes in mRNA content were calculated using the  $2^{-\Delta\Delta C_t}$  method. To account for the efficiency  
198 of RT and initial RNA concentration, the mRNA expression of four housekeeping genes was quantified, and  
199 their stability was determined using the BestKeeper software (38). Cyclophilin, glyceraldehyde 3-phosphate  
200 dehydrogenase (GAPDH), and beta-2-microglobulin (B2M) were classified as stable, whereas TATA-binding  
201 protein (TBP) was reported as unstable and was therefore excluded. These results were confirmed by the  
202 Normfinder algorithm (39).

### 203 *Statistical analysis*

204 All values are reported as mean  $\pm$  SD unless otherwise specified. To investigate the influence of exercise  
205 (Rest, +0 h, and +3 h) and training (Pre-HVT and Post-HVT), and the interaction between these two variables,  
206 two-way ANOVA with repeated measures were performed on absolute values, followed by Tukey's honestly  
207 significant difference post-hoc tests to assess differences between time points. Specifically, significant  
208 interactions and main effects were further analyzed with pre-planned contrasts comparing the Pre- and Post-  
209 HVT trials separately. Resting protein and mRNA content values in the Pre- and Post-HVT trials were also  
210 compared with a pre-planned paired t-test. Sigma Stat software (Jandel Scientific, USA) was used for all  
211 statistical analyses. The level of statistical significance was set a priori at  $P < 0.05$ .

## 212 Results

### 213 *Total work during the biopsy trials*

214 By design, the Pre- and Post-HVT HIIE sessions were performed at the same absolute exercise intensity  
215 ( $231.1 \pm 33.1$  W, Figure 3) and resulted in the same total work ( $277.3 \pm 39.8$  kJ). There was an increase ( $9.0 \pm$   
216  $6.1\%$ ,  $P = 0.002$ ) in the power attained at the lactate threshold ( $\dot{W}_{LT}$ ) following training ( $215.5 \pm 32.2$  vs.  
217  $234.7 \pm 36.8$  W, Pre- and Post-HVT, respectively; Figure 3), which resulted in the relative exercise intensity  
218 of the Pre-HVT biopsy trial ( $107.4 \pm 1.2\%$  of  $\dot{W}_{LT}$ ) being greater than the Post-HVT biopsy trial ( $98.8 \pm 5.2\%$   
219 of  $\dot{W}_{LT}$ ). Following training, there was also an increase in peak power ( $\dot{W}_{peak}$ ) ( $7.8 \pm 4.4\%$ ,  $P = 0.001$ ;  $292.5 \pm$   
220  $37.9$  vs.  $315.2 \pm 42.3$  W, Pre- and Post-HVT, respectively; Figure 3); consequently, the exercise intensity  
221 expressed relative to  $\dot{W}_{peak}$  was also greater in the Pre-HVT biopsy trial ( $78.9 \pm 2.4\%$  of  $\dot{W}_{peak}$ ) than the Post-  
222 HVT biopsy trial ( $73.3 \pm 3.7\%$  of  $\dot{W}_{peak}$ ). Post-HVT, there was an increase in peak oxygen uptake ( $\dot{V}O_{2peak}$ )  
223 ( $11.7 \pm 7.6\%$ ,  $P = 0.001$ ;  $46.2 \pm 7.6$  vs.  $51.4 \pm 7.8$  mL  $\cdot$  min $^{-1}$   $\cdot$  kg $^{-1}$ , Pre- and Post-HVT, respectively),  
224 whereas 20-km cycling time trial (20k-TT) time was decreased ( $5.2 \pm 2.3\%$ ,  $P < 0.001$ ;  $2140.8 \pm 99.9$  vs.  
225  $2028.1 \pm 87.5$  s, Pre- and Post-HVT, respectively). The participants' BM did not change post training ( $0.2 \pm$   
226  $1.6\%$ ,  $P = 0.720$ ;  $80.4 \pm 14.8$  vs.  $80.6 \pm 14.5$  kg, Pre- and Post-HVT, respectively).

### 227 *Muscle analyses (representative immunoblots are presented in Figure 2C)*

228 *PGC-1 $\alpha$  protein content.* There was an interaction effect in both subcellular compartments (nucleus:  $P =$   
229  $0.044$ , cytosol:  $P = 0.004$ ). In the nucleus (Figure 4A), PGC-1 $\alpha$  was increased at +3 h compared with Rest  
230 during the Pre-HVT (3.1-fold,  $P = 0.002$ ), but not during the Post-HVT (1.0-fold,  $P = 0.869$ ) biopsy trial.  
231 During the Pre-HVT, nuclear PGC-1 $\alpha$  was also greater at +3 h compared with Post-HVT (3.1-fold,  $P =$   
232  $0.015$ ). There was no significant difference in nuclear PGC-1 $\alpha$  protein content at Rest between the two biopsy  
233 trials (1.8-fold,  $P = 0.178$ ).

234 In the cytosol (Figure 4B), PGC-1 $\alpha$  increased compared with Rest both at +0 h (1.8-fold,  $P = 0.036$ ) and +3 h  
235 (2.2-fold,  $P < 0.001$ ) during the Pre-HVT, but not during the Post-HVT (1.1-fold,  $P = 1.000$  at +0 h; 0.8-fold,  
236  $P = 0.070$  at +3 h) biopsy trial. During the Pre-HVT biopsy trial, cytosolic PGC-1 $\alpha$  was also greater at +3 h  
237 (1.5-fold,  $P = 0.017$ ) compared with the same time point of the Post-HVT biopsy trial. At Rest, cytosolic  
238 PGC-1 $\alpha$  was greater Post-HVT compared with Pre-HVT (2.0-fold,  $P = 0.002$ ).

239 *Gene expression.* There was an interaction effect for PGC-1 $\alpha$  mRNA content ( $P = 0.020$ ; Figure 5A), which  
240 was increased at +3 h compared with Rest during the Pre-HVT (3.6-fold,  $P < 0.001$ ), but not during the Post-  
241 HVT (2.0-fold,  $P = 0.129$ ) biopsy trial. During the Pre-HVT biopsy trial, the mRNA content of PGC-1 $\alpha$  at +3  
242 h was also greater (1.9-fold,  $P < 0.001$ ) compared with that recorded at the same time point during the Post-  
243 HVT biopsy trial. There was no change in p53 mRNA content throughout (interaction:  $P = 0.425$ ; main effect  
244 of exercise:  $P = 0.379$ ; Figure 5B). Results for the mRNA content of *cyt c*, NRF-1 and NRF-2, PHF20, and  
245 TFAM are reported in Table 2.

246 *Phosphorylation of acetyl-CoA carboxylase (ACC) at serine 79 (p-ACC<sup>Ser79</sup>) protein content.* p-ACC<sup>Ser79</sup> was  
247 not detected in nuclear fractions (Figure 2C). In the cytosol (Figure 6), no interaction effect was reported ( $P =$   
248  $0.774$ ); however, there was a main effect of exercise ( $P < 0.001$ ), whereby p-ACC<sup>Ser79</sup> was greater compared  
249 with Rest at +0 h (1.7-fold,  $P < 0.001$ ). Pre-planned comparisons within biopsy trials indicated that at +0 h  
250 cytosolic p-ACC<sup>Ser79</sup> was greater compared with Rest during the Pre-HVT (2.0-fold,  $P = 0.013$ ), but not  
251 during the Post-HVT (1.4-fold,  $P = 0.114$ ) biopsy trial.

252 *p53 protein content.* In the nucleus (Figure 7A), there was an interaction effect ( $P = 0.016$ ); nuclear p53 was  
253 increased at +3 h compared with Rest during the Pre-HVT (2.8-fold;  $P = 0.004$ ), but not during the Post-HVT  
254 (1.2-fold,  $P = 0.328$ ) biopsy trial. At Rest, nuclear p53 was greater Post-HVT compared with Pre-HVT (1.6-  
255 fold,  $P = 0.042$ )

256 In the cytosol (Figure 7B), the interaction effect was not statistically significant ( $P = 0.051$ ); however, there  
257 was a main effect of exercise ( $P = 0.003$ ). Cytosolic p53 increased compared with Rest both at +0 h (1.9-fold,  
258  $P = 0.019$ ) and +3 h (2.2-fold,  $P = 0.004$ ). Pre-planned comparisons within trials revealed that during the Pre-  
259 HVT biopsy trial cytosolic p53 was greater compared with Rest at both +0 h (2.6-fold,  $P = 0.020$ ) and +3 h  
260 (3.2-fold,  $P < 0.001$ ); however, during the Post-HVT biopsy trial no differences compared with Rest were  
261 reported at +0h (1.3-fold,  $P = 0.440$ ) and +3 h (1.2-fold,  $P = 0.835$ ). There was no difference between the two  
262 biopsy trials at Rest (1.9-fold,  $P = 0.108$ ).

263 *PHF20 protein content.* No interaction effects were observed in the nuclear ( $P = 0.151$ ) and cytosolic ( $P =$   
264  $0.132$ ) fractions. In the nucleus (Figure 7C), there was a main effect of exercise ( $P = 0.049$ ), and PHF20 was  
265 greater compared with Rest at +3 h (2.0-fold,  $P = 0.040$ ). Pre-planned comparisons within biopsy trials  
266 indicated that at +3 h nuclear PHF20 was greater compared with Rest during the Pre-HVT (2.8-fold,  $P =$

267 0.025), but not during the Post-HVT (1.3-fold,  $P = 0.991$ ) biopsy trial. There was no difference between the  
268 two biopsy trials at Rest (1.9-fold,  $P = 0.339$ ).

269 In the cytosol (Figure 7D), a main effect of exercise ( $P = 0.014$ ) was also reported; cytosolic PHF20 was  
270 increased compared with Rest at +3 h (1.6-fold,  $P = 0.012$ ). Pre-planned comparisons within biopsy trials  
271 indicated that at +3 h cytosolic PHF20 was greater compared with Rest during the Pre-HVT (2.2-fold,  $P =$   
272 0.016), but not the Post-HVT (1.1-fold,  $P = 0.988$ ) biopsy trial. There was no difference between the two  
273 biopsy trials at Rest (1.5-fold,  $P = 0.618$ ).

274 *p-p53<sup>Ser15</sup> protein content.* In the nucleus (Figure 7E), there was an interaction effect ( $P = 0.021$ ); nuclear p-  
275 p53<sup>Ser15</sup> was increased compared with Rest at +3 h during the Pre-HVT (2.2-fold;  $P = 0.001$ ), but not during  
276 the Post-HVT (1.3-fold,  $P = 0.970$ ) biopsy trial.

277 In the cytosol (Figure 7F), there was no interaction effect ( $P = 0.136$ ); however, there was a main effect of  
278 exercise ( $P = 0.017$ ). Cytosolic p-p53<sup>Ser15</sup> was increased compared with Rest at +3 h (2.1-fold,  $P = 0.014$ ).  
279 Pre-planned comparisons within biopsy trials indicated that cytosolic p-p53<sup>Ser15</sup> was greater compared with  
280 Rest at +3 h during the Pre-HVT (3.2-fold,  $P = 0.003$ ), but not during the Post-HVT (1.1-fold,  $P = 0.963$ )  
281 biopsy trial.

## 282 **Discussion**

283 We report for the first time that 40 sessions of HIIT resulted in the loss of all measured exercise-induced  
284 molecular changes recorded Pre-HVT. Despite exercise-induced increases in the protein content of PGC-1 $\alpha$ ,  
285 p-ACC<sup>Ser79</sup>, p53, PHF20, and p-p53<sup>Ser15</sup>, and the mRNA content of PGC-1 $\alpha$  prior to HVT, there were no  
286 significant changes in any of these parameters when a session of HIIE was repeated at the same absolute  
287 exercise intensity post training. In most instances, this did not seem to be explained by increases in resting  
288 protein values Post-HVT. It remains to be determined if this loss stems from the decrease in the relative  
289 exercise intensity post-training (98.8 vs. 107.4% of  $\dot{V}_{LT}$  for Post- and Pre-HVT, respectively), habituation to  
290 the HIIE stimulus, or a combination of both.

291 We observed a significant exercise-induced increase in PGC-1 $\alpha$  protein content in both the nuclear and  
292 cytosolic fractions Pre-HVT, consistent with most previous research (13-16). However, for the first time we  
293 report that these exercise-induced increases were absent post training in both subcellular fractions. Although  
294 no direct comparison with previous research is possible, our findings are consistent with the lack of exercise-

295 induced increase in PGC-1 $\alpha$  protein content in whole-muscle lysates reported after a 12-day, 10-session,  
296 training intervention (23). A possible explanation for our findings is that Post-HVT the relative exercise  
297 intensity elicited during the session was lower compared with Pre-HVT (98.8 vs. 107.4% of  $\dot{W}_{LT}$  for Post- and  
298 Pre-HVT, respectively), suggesting that metabolic perturbations may have been reduced post-training. It has  
299 been proposed that metabolic perturbations (e.g., increases in intracellular calcium [Ca<sup>2+</sup>], adenosine  
300 monophosphate [AMP] to adenosine triphosphate [ATP] ratio, oxidized nicotinamide adenine dinucleotide  
301 [NAD<sup>+</sup>] to NADH ratio, reactive oxygen species [ROS] production) provide an important stimulus for  
302 exercise-induced mitochondrial biogenesis (8), and promote an increase in the nuclear content of PGC-1 $\alpha$   
303 protein (12). Indeed, as described more in depth later in the discussion, we also observed no significant  
304 changes in cytosolic p-ACC<sup>Ser79</sup> Post-HVT, which supports this hypothesis.

305 A strength of our study design is that participants were habituated to HIIE (12 sessions) during the NVT phase  
306 (30). This reduces the possibility that the different molecular responses to the Pre- and Post-HVT trials were  
307 due to muscle damage (31) or being unfamiliar with this type of exercise during the Pre-HVT trial (40).  
308 Future studies should investigate the effects of a single session of exercise performed at the same relative  
309 exercise intensity before, at different time points during, and after, a high volume of training (e.g., >25-30  
310 sessions), to determine if the complete loss of the exercise-induced increases in nuclear and cytosolic PGC-1 $\alpha$   
311 protein content also occurs if the relative exercise intensity is maintained pre- and post-training.

312 The reported increase in PGC-1 $\alpha$  protein content in both the nucleus and the cytosol may be attributable, at  
313 least in part, to increased protein stability (41). Both p38 mitogen-activated protein kinase (MAPK) (42) and  
314 AMP-activated protein kinase (AMPK) (43) act as signaling proteins that increase PGC-1 $\alpha$  stability via  
315 phosphorylation. Due to the limited amount of enriched lysates obtained during subcellular fractionation, we  
316 could not measure phosphorylation of p38 MAPK and/or AMPK directly. However, due to its molecular  
317 weight (~280 kDa), when blotting for lower molecular weight proteins we were also able to measure p-  
318 ACC<sup>Ser79</sup>, a downstream target and commonly-used marker of AMPK activation (44-46). As expected,  
319 cytosolic p-ACC<sup>Ser79</sup> (p-ACC<sup>Ser79</sup> was not detected in nuclear fractions as previously reported (13, 16))  
320 increased immediately post exercise Pre-HVT, but not Post-HVT, suggesting that abrogation of AMPK  
321 signaling may explain, at least in part, the abrogation of exercise-induced increases in PGC-1 $\alpha$  protein content  
322 post-training. Subcellular translocation is another factor that has been associated with increased PGC-1 $\alpha$   
323 protein content in the nucleus (12). While our data do not seem to indicate cytosolic/nuclear shuttling of PGC-

324  $1\alpha$ , protein translocation is a complex series of cellular processes that cannot be assessed by subcellular  
325 fractionation coupled with the immunoblotting technique (47).

326 The PGC- $1\alpha$  protein itself has been reported to increase PGC- $1\alpha$  transcriptional activity following exercise  
327 (19, 20) via an autoregulatory loop (18). The exercise-induced increase in PGC- $1\alpha$  mRNA content observed  
328 Pre-HVT is consistent with previous findings investigating HIIE (21, 22, 48-52) and with the notion that  
329 increased nuclear PGC- $1\alpha$  protein content and stability is associated with greater PGC- $1\alpha$  transcriptional  
330 activity (53). No exercise-induced increase in PGC- $1\alpha$  mRNA content was reported Post-HVT, suggesting  
331 that 20 days of HVT also blunted the exercise-induced increase in PGC- $1\alpha$  transcription. However, previous  
332 studies have reported a reduction (rather than complete loss) of the exercise-induced upregulation of PGC- $1\alpha$   
333 mRNA content post-training compared to pre-training when the exercise session was repeated at the same  
334 relative (22) or absolute (21, 23) exercise intensity. This discrepancy may relate to the much greater number  
335 of sessions performed between exercise biopsy trials in our study compared with these three previous studies  
336 (40 vs. 7 to 12, respectively), and a likely greater reduction in the relative exercise intensity between the Pre-  
337 and Post-HVT trials. Moreover, in contrast to the three previous studies, our participants were habituated to  
338 HIIE; this raises the possibility that the greater molecular response recorded pre-training in the previous  
339 studies may be partly attributable to the “first bout” effect (31, 40). Finally, findings from Perry, et al. (22)  
340 seem to suggest that it is the repetition of the same exercise session (even at the same relative exercise  
341 intensity) rather than exercise intensity per se that may be driving this decrease/elimination in exercise-  
342 induced increases in PGC- $1\alpha$  mRNA (and protein) content post-training.

343 To better characterize the effect of 40 sessions of HIIT on exercise-induced mitochondrial adaptations to  
344 HIIE, we also measured the mRNA content of nuclear (NRF-1 and NRF-2 (54)) and mitochondrial (TFAM  
345 (55)) transcription factors regulating mitochondrial biogenesis that are transcriptionally controlled by PGC- $1\alpha$   
346 (11). The mRNA content of *cyt c* (a gene under the regulation of PGC- $1\alpha$  and NRF1 (11)), p53 (a  
347 transcriptional regulator of PGC- $1\alpha$  gene expression (19)) and PHF20 (a transcription factor that activates p53  
348 gene expression (56)), were also measured. Apart from a decrease in *cyt c* mRNA content at +0 h in both  
349 HIIE trials, we observed no exercise-induced increases in any other gene either Pre- or Post-HVT. This is  
350 consistent with the majority of previous findings, as discussed in more detail in a previously published review  
351 article (9). A possible explanation for our findings may relate to biopsy timing, as there is evidence that the  
352 exercise-induced upregulation of some of these genes peaks more than 3 hours post-exercise (9, 48, 56-59).

353 Similar to our results for PGC-1 $\alpha$  protein we observed an exercise-induced increase in p53 protein content  
354 pre-training in the nuclear and cytosolic fractions, as previously demonstrated (13, 25). However, this  
355 exercise-induced increase in both subcellular fractions was blunted following 40 training sessions. No study  
356 has previously investigated exercise-induced changes in p53 protein content pre- and post-training in  
357 subcellular fractions. Nonetheless, our results are consistent with findings showing reduced/blunted exercise-  
358 induced mitochondrial adaptations (e.g., PGC-1 $\alpha$  mRNA, PGC-1 $\alpha$  protein in whole-muscle lysates) when the  
359 same exercise session is repeated post-training both at the same absolute (21, 23) or relative (22) exercise  
360 intensity.

361 A possible factor contributing to the lack of exercise-induced changes in nuclear p53 protein content Post-  
362 HVT is that 40 sessions of HIIT increased the resting values of p53 in the nucleus. This does not apply to the  
363 cytosolic fraction, however, given that resting values of p53 protein remained unchanged. A second factor  
364 relates to a possible decrease in subcellular shuttling (60); however, simply immunoblotting subcellular  
365 enriched fractions for p53 (or PGC-1 $\alpha$ ) protein is not a valid technique to demonstrate p53 (similar to PGC-  
366 1 $\alpha$ ) nuclear/cytosolic shuttling - a process requiring an intricate and tightly synchronized series of events (26,  
367 60). Nonetheless, we observed a concomitant increase in p53 and PHF20 protein content in the nucleus pre-  
368 HVT (as previously demonstrated (13)), but not Post-HVT. In this regard, PHF20 has been reported to  
369 increase p53 protein stability (27) by disrupting the murine double minute-2 (MDM2)-p53 interaction (61)  
370 responsible for p53 protein degradation (27, 29). Although we were not able to measure the interaction  
371 between these two proteins due to limited lysate availability, it is plausible that our findings may indicate  
372 greater p53-PHF20, and reduced p53-MDM2, interaction Pre- vs Post-HVT. In the cytosolic enriched  
373 fractions, findings are similar; however, the increase in p53 protein content at +0 h was not matched by an  
374 increase in PHF20 protein content. This could suggest that cellular events other than the p53 interaction with  
375 PHF20 may also induce p53 protein stability.

376 A second important event disrupting the p53-MDM2 interaction and promoting p53 stability is  
377 phosphorylation of p53 at serine 15 (28). Pre-HVT, and consistent with this notion, nuclear p-p53<sup>Ser15</sup>  
378 increased in parallel with the increase in p53 protein content, as previously reported (13). In the cytosol,  
379 however, p53 protein content increased earlier than p-p53<sup>Ser15</sup> (+0 h vs. +3 h, respectively), indicating once  
380 again that other cellular mechanisms may be involved in the regulation of the p53 protein stability. In  
381 contrast, no exercise-induced changes in p-p53<sup>Ser15</sup> in either the nuclear or cytosolic fractions were reported  
382 Post-HVT.

383 Phosphorylation of p53 at serine 15 is regulated by signaling kinases such as p38 MAPK (62) and AMPK  
384 (63). For the same reasons explained above, we were only able to measure p-ACC<sup>Ser79</sup> as a readout of AMPK  
385 activation (46). In the cytosol, p-ACC<sup>Ser79</sup> was increased at +0 h during the Pre-HVT, but not during the Post-  
386 HVT biopsy trial, consistent with the exercise-induced increase reported in p-p53<sup>Ser15</sup>. This change may have  
387 contributed to the abrogation of the p53-mediated exercise-induced changes Post-HVT.

388 This research adds novel information regarding the early events regulating the exercise-induced mitochondrial  
389 response to an HIIE session repeated at the same absolute exercise intensity before and after a training  
390 intervention. We provide evidence that 40 sessions of HIIT blunted the exercise-induced increases recorded  
391 pre-training in all of the molecular events measured. Future studies should investigate if the loss (or  
392 reduction) of the exercise-induced increases in markers of mitochondrial adaptations post-training relates  
393 solely to the decrease in relative exercise intensity, and/or if this is exacerbated by the continuous repetition of  
394 the same exercise stimulus during the training intervention. Well-designed experiments comparing exercise  
395 sessions repeated pre- and post-training at the same relative exercise intensity and at different time points  
396 during the training intervention (even only after 1 or 2 training sessions to determine the role, if any, of the  
397 “first bout effect”) should provide valuable insight into the mechanisms driving this phenomenon. Where  
398 possible, these experiments should also employ more novel and sophisticated techniques for the assessment of  
399 a multitude of exercise-induced mitochondrial changes (e.g., transcriptomics, proteomics), as well as  
400 measuring metabolic perturbations post-exercise (e.g. lactate and other metabolites).



401 **Acknowledgements**

402 We thank the participants for their time, effort and commitment to this study. The authors would like to  
403 acknowledge Ms. Elise Brentnall and Mr. Maarten Missinne for their valuable help in data collection and  
404 biochemical analyses, respectively.

405 **Author contributions**

406 D. J. Bishop and C. Granata designed the research; C. Granata and R. S. F. Oliveira conducted the research;  
407 C. Granata, R. S. F. Oliveira, J. P. Little, and D. J. Bishop analyzed and interpreted the data; C. Granata wrote  
408 the manuscript; C. Granata, R. S. F. Oliveira, J. P. Little, and D. J. Bishop critically revised and contributed to  
409 the manuscript; C. Granata and D. J. Bishop have primary responsibility for final content. Data collection took  
410 place at Victoria University. Muscle analysis took place at Victoria University and the University of British  
411 Columbia Okanagan. All persons designated as authors qualify for authorship, and all those qualifying for  
412 authorship are listed. All authors have read and approved the final manuscript.

413 **Conflict of interest**

414 The authors declare no conflict of interest.

415 **Funding**

416 This study was funded by a grant from the ANZ-MASON Foundation provided to DJB and a Natural  
417 Sciences and Engineering Research Council of Canada Discovery Grant to JPL.

418 **References**

- 419 1. Handschin, C., and Spiegelman, B. M. (2006) Peroxisome proliferator-activated receptor  $\gamma$  coactivator  
420 1 coactivators, energy homeostasis, and metabolism. *Endocr. Rev.* **27**, 728-735
- 421 2. Jacobs, R. A., and Lundby, C. (2013) Mitochondria express enhanced quality as well as quantity in  
422 association with aerobic fitness across recreationally active individuals up to elite athletes. *J. Appl. Physiol.*  
423 **114**, 344-350
- 424 3. Nunnari, J., and Suomalainen, A. (2012) Mitochondria: in sickness and in health. *Cell* **148**, 1145-1159
- 425 4. Booth, F. W., Gordon, S. E., Carlson, C. J., and Hamilton, M. T. (2000) Waging war on modern  
426 chronic diseases: primary prevention through exercise biology. *J. Appl. Physiol.* **88**, 774-787
- 427 5. Luft, R. (1994) The development of mitochondrial medicine. *Proc Natl Acad Sci USA* **91**, 8731-8738
- 428 6. Holloszy, J. O. (1967) Biochemical adaptations in muscle. Effects of exercise on mitochondrial  
429 oxygen uptake and respiratory enzyme activity in skeletal muscle. *J. Biol. Chem.* **242**, 2278-2282
- 430 7. Granata, C., Jamnick, N. A., and Bishop, D. J. (2018) Training-induced changes in mitochondrial  
431 content and respiratory function in human skeletal muscle. *Sports Med.* **48**, 1809–1828
- 432 8. Egan, B., and Zierath, J. R. (2013) Exercise metabolism and the molecular regulation of skeletal  
433 muscle adaptation. *Cell Metab.* **17**, 162-184
- 434 9. Granata, C., Jamnick, N. A., and Bishop, D. J. (2018) Principles of exercise prescription, and how they  
435 influence exercise-induced changes of transcription factors and other regulators of mitochondrial biogenesis.  
436 *Sports Med.* **48**, 1541–1559
- 437 10. Hood, D. A. (2009) Mechanisms of exercise-induced mitochondrial biogenesis in skeletal muscle.  
438 *Appl. Physiol. Nutr. Metab.* **34**, 465-472
- 439 11. Wu, Z., Puigserver, P., Andersson, U., Zhang, C., Adelmant, G., Mootha, V., Troy, A., Cinti, S.,  
440 Lowell, B., Scarpulla, R. C., and Spiegelman, B. M. (1999) Mechanisms controlling mitochondrial biogenesis  
441 and respiration through the thermogenic coactivator PGC-1. *Cell* **98**, 115-124
- 442 12. Wright, D. C., Han, D. H., Garcia-Roves, P. M., Geiger, P. C., Jones, T. E., and Holloszy, J. O. (2007)  
443 Exercise-induced mitochondrial biogenesis begins before the increase in muscle PGC-1 $\alpha$  expression. *J. Biol.*  
444 *Chem.* **282**, 194-199
- 445 13. Granata, C., Oliveira, R. S. F., Little, J. P., Renner, K., and Bishop, D. J. (2017) Sprint-interval but not  
446 continuous exercise increases PGC-1 $\alpha$  protein content and p53 phosphorylation in nuclear fractions of human  
447 skeletal muscle. *Sci. Rep.* **7**, 44227

- 448 14. Heesch, M. W., Shute, R. J., Kreiling, J. L., and Slivka, D. R. (2016) Transcriptional control, but not  
449 subcellular location, of PGC-1 $\alpha$  is altered following exercise in a hot environment. *J. Appl. Physiol.* **121**, 741-  
450 749
- 451 15. Little, J. P., Safdar, A., Bishop, D., Tarnopolsky, M. A., and Gibala, M. J. (2011) An acute bout of  
452 high-intensity interval training increases the nuclear abundance of PGC-1 $\alpha$  and activates mitochondrial  
453 biogenesis in human skeletal muscle. *Am. J. Physiol. Regul. Integr. Comp. Physiol.* **300**, R1303-1310
- 454 16. Little, J. P., Safdar, A., Cermak, N., Tarnopolsky, M. A., and Gibala, M. J. (2010) Acute endurance  
455 exercise increases the nuclear abundance of PGC-1 $\alpha$  in trained human skeletal muscle. *Am. J. Physiol.*  
456 *Endocrinol. Metab.* **298**, R912-R917
- 457 17. Puigserver, P., and Spiegelman, B. M. (2003) Peroxisome proliferator-activated receptor- $\gamma$  coactivator  
458 1 $\alpha$  (PGC-1 $\alpha$ ): Transcriptional coactivator and metabolic regulator. *Endocr. Rev.* **24**, 78-90
- 459 18. Handschin, C., Rhee, J., Lin, J., Tarr, P. T., and Spiegelman, B. M. (2003) An autoregulatory loop  
460 controls peroxisome proliferator-activated receptor  $\gamma$  coactivator 1 $\alpha$  expression in muscle. *Proc. Natl. Acad.*  
461 *Sci. U. S. A.* **100**, 7111-7116
- 462 19. Irrcher, I., Ljubcic, V., Kirwan, A. F., and Hood, D. A. (2008) AMP-activated protein kinase-  
463 regulated activation of the PGC-1 $\alpha$  promoter in skeletal muscle cells. *PLoS One* **3**
- 464 20. Pilegaard, H., Saltin, B., and Neufer, D. P. (2003) Exercise induces transient transcriptional activation  
465 of the PGC-1 $\alpha$  gene in human skeletal muscle. *J. Physiol.* **546**, 851-858
- 466 21. Morrison, D., Hughes, J., Della Gatta, P. A., Mason, S., Lamon, S., Russell, A. P., and Wadley, G. D.  
467 (2015) Vitamin C and E supplementation prevents some of the cellular adaptations to endurance-training in  
468 humans. *Free Radic. Biol. Med.* **89**, 852-862
- 469 22. Perry, C. G. R., Lally, J., Holloway, G. P., Heigenhauser, G. J. F., Bonen, A., and Spriet, L. L. (2010)  
470 Repeated transient mRNA bursts precede increases in transcriptional and mitochondrial proteins during  
471 training in human skeletal muscle. *J. Physiol.* **588**, 4795-4810
- 472 23. Stepto, N. K., Benziane, B., Wadley, G. D., Chibalin, A. V., Canny, B. J., Eynon, N., and McConell,  
473 G. K. (2012) Short-term intensified cycle training alters acute and chronic responses of PGC1 $\alpha$  and  
474 cytochrome c oxidase IV to exercise in human skeletal muscle. *PLoS One* **7**
- 475 24. Saleem, A., Carter, H. N., Iqbal, S., and Hood, D. A. (2011) Role of p53 within the regulatory network  
476 controlling muscle mitochondrial biogenesis. *Exerc. Sport Sci. Rev.* **39**, 199-205
- 477 25. Tachtsis, B., Smiles, W., Lane, S., Hawley, J., and Camera, D. M. (2016) Acute endurance exercises  
478 induces nuclear p53 abundance in human skeletal muscle. *Front. Physiol.* **7**

- 479 26. Marchenko, N. D., Hanel, W., Li, D., Becker, K., Reich, N., and Moll, U. M. (2010) Stress-mediated  
480 nuclear stabilization of p53 is regulated by ubiquitination and importin- $\alpha$ 3 binding. *Cell Death Differ.* **17**,  
481 255-267
- 482 27. Oren, M. (1999) Regulation of the p53 tumor suppressor protein. *J. Biol. Chem.* **274**, 36031-36034
- 483 28. Shieh, S. Y., Ikeda, M., Taya, Y., and Prives, C. (1997) DNA damage-induced phosphorylation of p53  
484 alleviates inhibition by MDM2. *Cell* **91**, 325-334
- 485 29. Haupt, Y., Maya, R., Kazaz, A., and Oren, M. (1997) Mdm2 promotes the rapid degradation of p53.  
486 *Nature* **387**, 296-299
- 487 30. Granata, C., Oliveira, R. S. F., Little, J. P., Renner, K., and Bishop, D. J. (2016) Mitochondrial  
488 adaptations to high-volume exercise training are rapidly reversed after a reduction in training volume in  
489 human skeletal muscle. *FASEB J.* **30**, 3413-3423
- 490 31. Murton, A. J., Billeter, R., Stephens, F. B., Des Etages, S. G., Graber, F., Hill, R. J., Marimuthu, K.,  
491 and Greenhaff, P. L. (2013) Transient transcriptional events in human skeletal muscle at the outset of  
492 concentric resistance exercise training. *J. Appl. Physiol.* **116**, 113-125
- 493 32. Bishop, D. J., Jenkins, D. G., McEniery, M., and Carey, M. F. (2000) Relationship between plasma  
494 lactate parameters and muscle characteristics in female cyclists. *Med. Sci. Sports Exerc.* **32**, 1088-1093
- 495 33. Granata, C., Oliveira, R. S. F., Little, J. P., Renner, K., and Bishop, D. J. (2016) Training intensity  
496 modulates changes in PGC-1 $\alpha$  and p53 protein content and mitochondrial respiration, but not markers of  
497 mitochondrial content in human skeletal muscle. *FASEB J.* **30**, 959-970
- 498 34. Halson, S. L., Bridge, M. W., Meeusen, R., Busschaert, B., Gleeson, M., Jones, D. A., and  
499 Jeukendrup, A. E. (2002) Time course of performance changes and fatigue markers during intensified training  
500 in trained cyclists. *J. Appl. Physiol.* **93**, 947-956
- 501 35. Welinder, C., and Ekblad, L. (2011) Coomassie staining as loading control in Western blot analysis. *J.*  
502 *Proteome Res.* **10**, 1416-1419
- 503 36. Eaton, M., Granata, C., Barry, J., Safdar, A., Bishop, D., and Little, J. P. (2018) Impact of a single  
504 bout of high-intensity interval exercise and short-term interval training on interleukin-6, FNDC5, and  
505 METRN mRNA expression in human skeletal muscle. *Journal of Sport and Health Science* **7**, 191-196
- 506 37. Kuang, J., Yan, X., Genders, A. J., Granata, C., and Bishop, D. J. (2018) An overview of technical  
507 considerations when using quantitative real-time PCR analysis of gene expression in human exercise research.  
508 *PLoS One* **13**, e0196438

- 509 38. Pfaffl, M. W., Tichopad, A., Prgomet, C., and Neuvians, T. P. (2004) Determination of stable  
510 housekeeping genes, differentially regulated target genes and sample integrity: BestKeeper - Excel-based tool  
511 using pair-wise correlations. *Biotechnol. Lett.* **26**, 509-515
- 512 39. Andersen, C. L., Jensen, J. L., and Ørntoft, T. F. (2004) Normalization of Real-Time Quantitative  
513 Reverse Transcription-PCR Data: A Model-Based Variance Estimation Approach to Identify Genes Suited for  
514 Normalization, Applied to Bladder and Colon Cancer Data Sets. *Cancer Res.* **64**, 5245-5250
- 515 40. Bishop, D. J., Botella, J., Genders, A. J., Lee, M. J.-C., Saner, N. J., Kuang, J., Yan, X., and Granata,  
516 C. (2019) High-Intensity Exercise and Mitochondrial Biogenesis: Current Controversies and Future Research  
517 Directions. *Physiology* **34**, 56-70
- 518 41. Rodgers, J. T., Lerin, C., Gerhart-Hines, Z., and Puigserver, P. (2008) Metabolic adaptations through  
519 the PGC-1 $\alpha$  and SIRT1 pathways. *FEBS Lett.* **582**, 46-53
- 520 42. Puigserver, P., Rhee, J., Lin, J., Wu, Z., Yoon, J. C., Zhang, C. Y., Krauss, S., Mootha, V. K., Lowell,  
521 B. B., and Spiegelman, B. M. (2001) Cytokine Stimulation of Energy Expenditure through p38 MAP Kinase  
522 Activation of PPAR $\gamma$  Coactivator-1. *Mol. Cell* **8**, 971-982
- 523 43. Canto, C., and Auwerx, J. (2009) PGC-1 $\alpha$ , SIRT1 and AMPK, an energy sensing network that  
524 controls energy expenditure. *Curr. Opin. Lipidol.* **20**, 98-105
- 525 44. Chen, Z. P., Stephens, T. J., Murthy, S., Canny, B. J., Hargreaves, M., Witters, L. A., Kemp, B. E.,  
526 and McConell, G. K. (2003) Effect of exercise intensity on skeletal muscle AMPK signaling in humans.  
527 *Diabetes* **52**, 2205-2212
- 528 45. Chen, Z.-P., McConell, G. K., Michell, B. J., Snow, R. J., Canny, B. J., and Kemp, B. E. (2000)  
529 AMPK signaling in contracting human skeletal muscle: acetyl-CoA carboxylase and NO synthase  
530 phosphorylation. *American Journal of Physiology-Endocrinology And Metabolism* **279**, E1202-E1206
- 531 46. Jäger, S., Handschin, C., St-Pierre, J., and Spiegelman, B. M. (2007) AMP-activated protein kinase  
532 (AMPK) action in skeletal muscle via direct phosphorylation of PGC-1 $\alpha$ . *Proc Natl Acad Sci USA* **104**,  
533 12017-12022
- 534 47. Alberts, B., Johnson, A., Lewis, J., Raff, M., Roberts, K., and Walter, P. (2007) *Molecular Biology of*  
535 *the Cell. 5th edition*, Garland Science, New York, NY:
- 536 48. De Filippis, E., Alvarez, G., Berria, R., Cusi, K., Everman, S., Meyer, C., and Mandarino, L. J. (2008)  
537 Insulin-resistant muscle is exercise resistant: Evidence for reduced response of nuclear-encoded mitochondrial  
538 genes to exercise. *Am. J. Physiol. Endocrinol. Metab.* **294**, E607-E614

- 539 49. Edgett, B. A., Foster, W. S., Hankinson, P. B., Simpson, C. A., Little, J. P., Graham, R. B., and Gurd,  
540 B. J. (2013) Dissociation of increases in PGC-1 $\alpha$  and its regulators from exercise intensity and muscle  
541 activation following acute exercise. *PLoS One* **8**
- 542 50. Nordsborg, N. B., Lundby, C., Leick, L., and Pilegaard, H. (2010) Relative workload determines  
543 exercise-induced increases in PGC-1 $\alpha$  mRNA. *Med. Sci. Sports Exerc.* **42**, 1477-1484
- 544 51. Popov, D., Zinovkin, R., Karger, E., Tarasova, O., and Vinogradova, O. (2014) Effects of continuous  
545 and intermittent aerobic exercise upon mRNA expression of metabolic genes in human skeletal muscle. *J.*  
546 *Sports Med. Phys. Fitness* **54**, 362-369
- 547 52. Popov, D. V., Zinovkin, R. A., Karger, E. M., Tarasova, O. S., and Vinogradova, O. L. (2013) The  
548 effect of aerobic exercise on the expression of genes in skeletal muscles of trained and untrained men. *Hum.*  
549 *Physiol.* **39**, 190-195
- 550 53. Anderson, R. M., Barger, J. L., Edwards, M. G., Braun, K. H., O'Connor, C. E., Prolla, T. A., and  
551 Weindruch, R. (2008) Dynamic regulation of PGC-1 $\alpha$  localization and turnover implicates mitochondrial  
552 adaptation in calorie restriction and the stress response. *Aging Cell* **7**, 101-111
- 553 54. Scarpulla, R. C. (2002) Nuclear activators and coactivators in mammalian mitochondrial biogenesis.  
554 *Biochim. Biophys. Acta, Gene Struct. Expression* **1576**, 1-14
- 555 55. Scarpulla, R. C. (2008) Transcriptional paradigms in mammalian mitochondrial biogenesis and  
556 function. *Physiol. Rev.* **88**, 611-638
- 557 56. Park, S., Kim, D., Dan, H. C., Chen, H., Testa, J. R., and Cheng, J. Q. (2012) Identification of Akt  
558 interaction protein PHF20/TZP that transcriptionally regulates p53. *J. Biol. Chem.* **287**, 11151-11163
- 559 57. Cartoni, R., Léger, B., Hock, M. B., Praz, M., Crettenand, A., Pich, S., Ziltener, J. L., Luthi, F.,  
560 Dériaz, O., Zorzano, A., Gobelet, C., Kralli, A., and Russell, A. P. (2005) Mitofusins 1/2 and ERR $\alpha$   
561 expression are increased in human skeletal muscle after physical exercise. *J. Physiol.* **567**, 349-358
- 562 58. Egan, B., O'Connor, P. L., Zierath, J. R., and O'Gorman, D. J. (2013) Time course analysis reveals  
563 gene-specific transcript and protein kinetics of adaptation to short-term aerobic exercise training in human  
564 skeletal muscle. *PLoS One* **8**
- 565 59. Hammond, K. M., Impey, S. G., Currell, K., Mitchell, N., Shepherd, S. O., Jeromson, S., Hawley, J.  
566 A., Close, G. L., Hamilton, L. D., Sharples, A. P., and Morton, J. P. (2016) Postexercise high-fat feeding  
567 suppresses p70S6K1 activity in human skeletal muscle. *Med. Sci. Sports Exerc.* **48**, 2108-2117
- 568 60. Gottifredi, V., and Prives, C. (2001) Getting p53 out of the nucleus. *Science* **292**, 1851-1852

- 569 61. Cui, G., Park, S., Badeaux, A. I., Kim, D., Lee, J., Thompson, J. R., Yan, F., Kaneko, S., Yuan, Z.,  
570 Botuyan, M. V., Bedford, M. T., Cheng, J. Q., and Mer, G. (2012) PHF20 is an effector protein of p53 double  
571 lysine methylation that stabilizes and activates p53. *Nature Structural and Molecular Biology* **19**, 916-924
- 572 62. She, Q. B., Bode, A. M., Ma, W. Y., Chen, N. Y., and Dong, Z. (2001) Resveratrol-induced activation  
573 of p53 and apoptosis is mediated by extracellular-signal-regulated protein kinases and p38 kinase. *Cancer*  
574 *Res.* **61**, 1604-1610
- 575 63. Jones, R. G., Plas, D. R., Kubek, S., Buzzai, M., Mu, J., Xu, Y., Birnbaum, M. J., and Thompson, C.  
576 B. (2005) AMP-activated protein kinase induces a p53-dependent metabolic checkpoint. *Mol. Cell* **18**, 283-  
577 293

578

579 Tables

580 Table 1. Primers used for real-time PCR analyses of mRNA expression.

| <b>Gene</b>    | <b>Primer efficiency</b> | <b>Forward primer (5'→3')</b> | <b>Reverse primer (5'→3')</b> |
|----------------|--------------------------|-------------------------------|-------------------------------|
| ACTB           | 107%                     | GAGCACAGAGCCTCGCCTTT          | TCATCATCCATGGTGAGCTGGC        |
| B2M            | 98%                      | TGCTGTCTCCATGTTTGATGTATCT     | TCTCTGCTCCCCACCTCTAAGT        |
| <i>cyt c</i>   | 98.8%                    | GGGCCAAATCTCCATGGTCT          | TCTCCCCAGATGATGCCTTT          |
| GAPDH          | 106%                     | AATCCCATCACCATCTTCCA          | TGGACTCCACGACGTACTCA          |
| NRF-1          | 80.7%                    | CTACTCGTGTGGGACAGCAA          | AGCAGACTCCAGGTCTTCCA          |
| NRF-2          | 92%                      | AAGTGACAAGATGGGCTGCT          | TGGACCACTGTATGGGATCA          |
| p53            | 101.8%                   | GTTCCGAGAGCTGAATGAGG          | TTATGGCGGGAGGTAGACTG          |
| PGC-1 $\alpha$ | 103.6%                   | GGCAGAAGGCAATTGAAGAG          | TCAAAACGGTCCCTCAGTTC          |
| PHF20          | 117.5%                   | GTGGGGCCGTGAGGAGAATA          | AACTGGGCTCCCACTTCAAA          |
| TBP            | 99%                      | CAGTGACCCAGCAGCATCACT         | AGGCCAAGCCCTGAGCGTAA          |
| TFAM           | 109.3%                   | CCGAGGTGGTTTTTCATCTGT         | GCATCTGGGTTCTGAGCTTT          |

581 ACTB,  $\beta$ -actin; B2M, beta-2-microglobulin; *cyt c*, cytochrome *c*; GAPDH, glyceraldehyde 3-phosphate dehydrogenase;  
 582 NRF1, nuclear respiratory factor 1; NRF2, nuclear respiratory factor 2; PGC-1 $\alpha$ , peroxisome proliferator-activated  
 583 receptor  $\gamma$  coactivator-1 $\alpha$ ; PHF20, plant homeodomain finger-containing protein 20; TBP, TATA-binding protein;  
 584 TFAM, mitochondrial transcription factor A.



585 Table 2. mRNA content of cytochrome *c* (cyt *c*), nuclear respiratory factor 1 (NRF-1) and 2 (NRF-2), plant  
 586 homeodomain finger-containing protein 20 (PHF20), and mitochondrial transcription factor A (TFAM)  
 587 measured immediately post (+0 h) and 3 h (+3 h) after a single session of high-intensity interval exercise  
 588 (HIIE) performed at the same absolute intensity before (Pre-HVT) and after (Post-HVT) 40 sessions of twice-  
 589 daily high-volume high-intensity interval training (HVT), in the vastus lateralis muscle of young healthy men.  
 590 Values are expressed relative to TATA-binding protein (TBP), glyceraldehyde 3-phosphate dehydrogenase  
 591 (GAPDH), and  $\beta$ -actin (ACTB) housekeeping genes.

| Gene         | Time Point | Pre-HVT     | Post-HVT    |
|--------------|------------|-------------|-------------|
| cyt <i>c</i> | Rest       | 2.06 ± 0.89 | 2.79 ± 1.55 |
|              | +0 h #     | 1.63 ± 0.44 | 1.46 ± 0.67 |
|              | +3 h       | 1.70 ± 0.64 | 2.48 ± 1.37 |
| NRF-1        | Rest       | 0.14 ± 0.08 | 0.13 ± 0.06 |
|              | +0 h       | 0.19 ± 0.09 | 0.14 ± 0.04 |
|              | +3 h       | 0.15 ± 0.05 | 0.16 ± 0.05 |
| NRF-2        | Rest       | 0.23 ± 0.07 | 0.21 ± 0.06 |
|              | +0 h       | 0.23 ± 0.09 | 0.19 ± 0.05 |
|              | +3 h       | 0.28 ± 0.13 | 0.26 ± 0.15 |
| PHF20        | Rest       | 0.33 ± 0.08 | 0.27 ± 0.04 |
|              | +0 h       | 0.31 ± 0.07 | 0.24 ± 0.05 |
|              | +3 h       | 0.31 ± 0.08 | 0.46 ± 0.50 |
| TFAM         | Rest       | 0.48 ± 0.14 | 0.44 ± 0.09 |
|              | +0 h       | 0.40 ± 0.11 | 0.37 ± 0.08 |
|              | +3 h       | 0.47 ± 0.13 | 0.44 ± 0.12 |

592 # Main effect of exercise ( $P < 0.05$ ) vs. Rest. All values are mean ± SD. n = 9 for NRF1; n = 8 for all other genes.

593 **Figures**

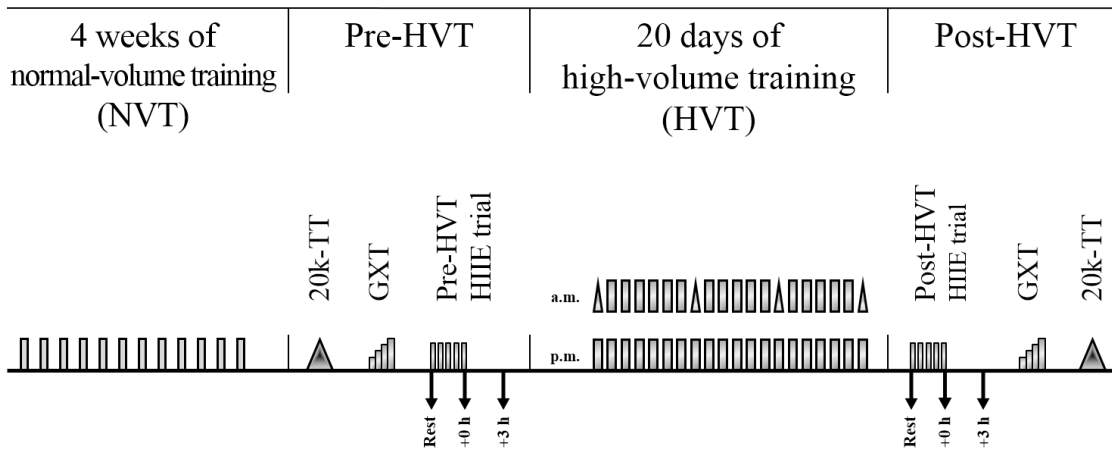

594

595 Figure 1. **Study design.** Grey rectangles indicate a HIIE session; grey triangles within HVT indicate a 10-km cycling  
596 time trial; each rectangle and/or vertical pair of rectangles and/or vertical pair of rectangles and triangles represents a  
597 training day; arrows indicate a skeletal muscle biopsy. 20k-TT: 20-km cycling time trial; GXT: graded exercise test;  
598 HIIE: high-intensity interval exercise; Rest: skeletal muscle biopsy at rest; +0 h: skeletal muscle biopsy taken at the end  
599 of the HIIE session; +3 h: skeletal muscle biopsy taken three hours after the completion of the HIIE session.

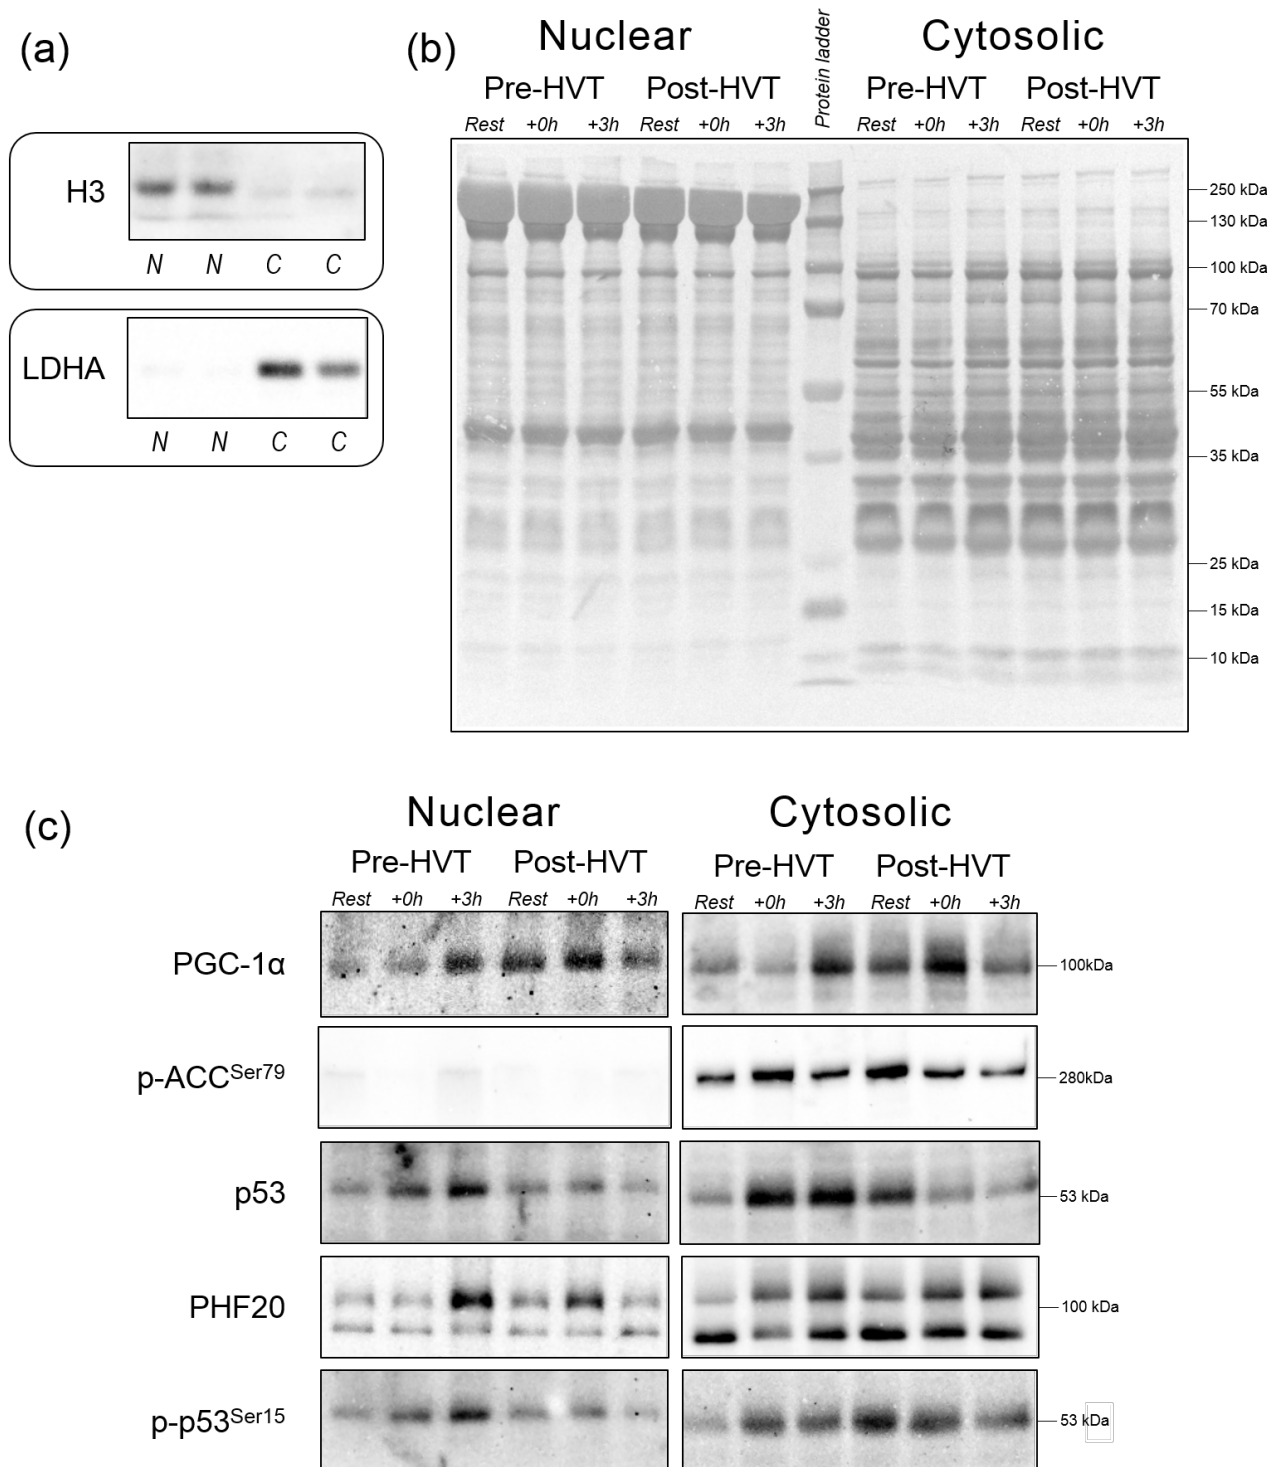

600

601 Figure 2. **Representative immunoblots, subcellular enrichment and protein loading controls.** (a) Representative  
 602 immunoblots of peroxisome proliferator-activated receptor  $\gamma$  coactivator-1 $\alpha$  (PGC-1 $\alpha$ ), acetyl-CoA carboxylase  
 603 phosphorylated at serine 79 (p-ACC<sup>Ser79</sup>), p53, plant homeodomain finger-containing protein 20 (PHF20), and p53

604 phosphorylated at serine 15 (p-p53<sup>Ser15</sup>) measured in the nuclear and cytosolic fractions obtained from human vastus  
605 lateralis muscle biopsies, before (Rest), immediately post (+0 h), and 3 h (+3 h) after a single session of high-intensity  
606 interval exercise (HIIE) performed at the same absolute intensity before (Pre-HVT) and after (Post-HVT) 40 sessions of  
607 twice-daily high-volume high-intensity interval training (HVT). PHF20: top band at ~105 kDa. No band was detected in  
608 the nuclear fractions for p-ACC<sup>Ser79</sup>. (b) Histone H3 and lactate dehydrogenase A (LDHA) were used as indicators of  
609 cytosolic and nuclear enrichment, respectively. N: nuclear fractions; C: cytosolic fractions. (c) Whole-lane Coomassie  
610 blue staining for both nuclear and cytosolic fractions was used to verify equal loading between lanes. The immunoblot  
611 and whole-lane Coomassie images in this figure were cropped to improve the conciseness and clarity of the  
612 presentation.

613

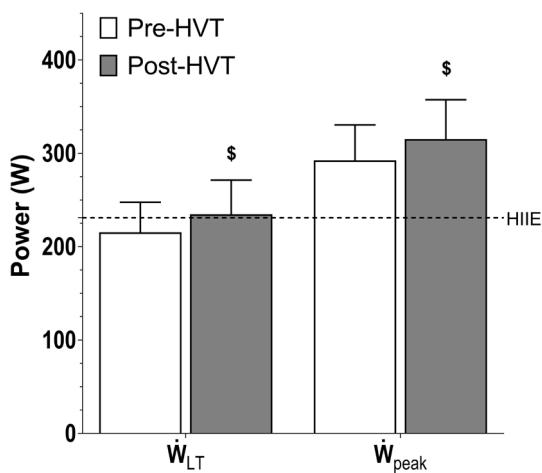

614

615 **Figure 3. Power attained at the lactate threshold ( $\dot{W}_{LT}$ ), peak power achieved during the graded exercise test**  
616 **( $\dot{W}_{peak}$ ), and mean power of the Pre- and Post-HVT high-intensity interval exercise (HIIE) biopsy trials.**  $\dot{W}_{LT}$  and  
617  $\dot{W}_{peak}$  were assessed before (Pre-HVT) and after (Post-HVT) 40 sessions of twice-daily high-volume high-intensity  
618 interval training (HVT). The dotted line represents the mean power during the Pre- and Post-HVT HIIE biopsy trials. n  
619 = 9. \$  $P < 0.05$  vs. Pre-HVT.

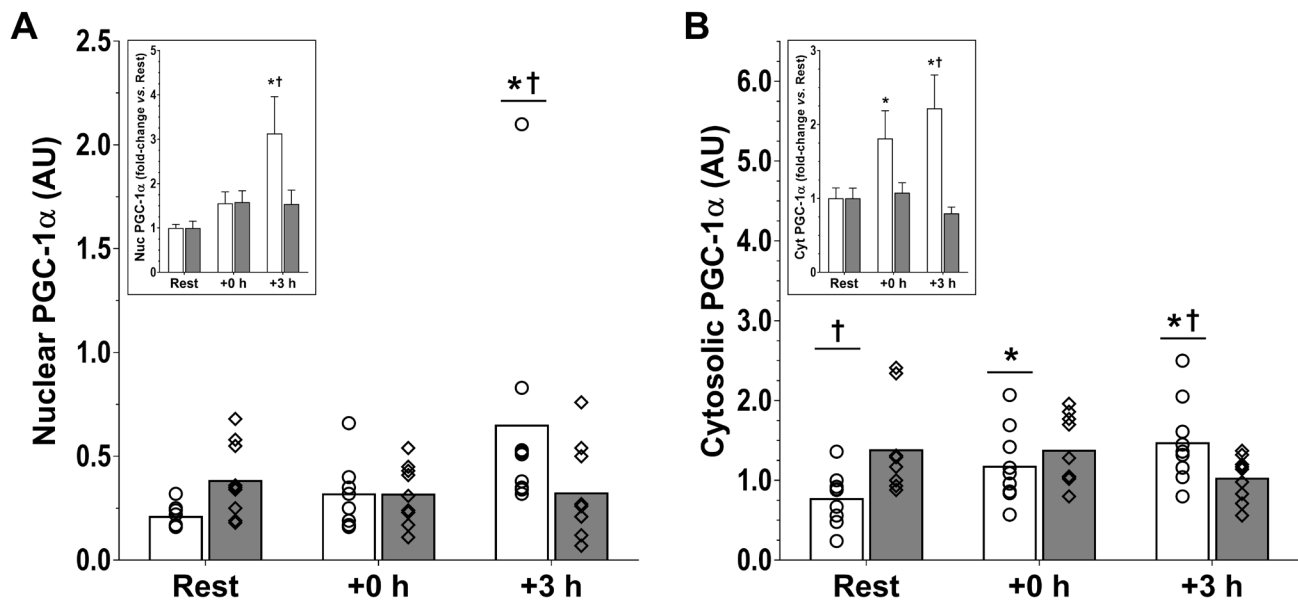

620

621 **Figure 4. Peroxisome proliferator-activated receptor  $\gamma$  coactivator-1 $\alpha$  (PGC-1 $\alpha$ ) protein.** Protein content of PGC-  
 622 1 $\alpha$  in nuclear (a), and cytosolic (b) sub fractions before (Rest), immediately post (+0 h), and 3 h (+3 h) after a single  
 623 session of high-intensity interval exercise (HIIE) performed at the same absolute intensity before (Pre-HVT) and (Post-  
 624 HVT) 40 sessions of twice-daily high-volume high-intensity interval training (HVT), in the vastus lateralis muscle of  
 625 young healthy men (n = 9). Open circles (Pre-HVT) and open diamonds (Post-HVT) represent individual values; white  
 626 (Pre-HVT) and grey (Post-HVT) bars represent mean values. \*  $P < 0.05$  vs. Rest of the same group; †  $P < 0.05$  vs. same  
 627 time point of Post-HVT trial. To more clearly depict fold-changes in post-exercise values from potentially different Rest  
 628 values in the untrained and trained state, an inset has been added to each main figure (note, significant differences  
 629 between trained and untrained values at Rest are not reported in insets as these values are both normalized to 1).

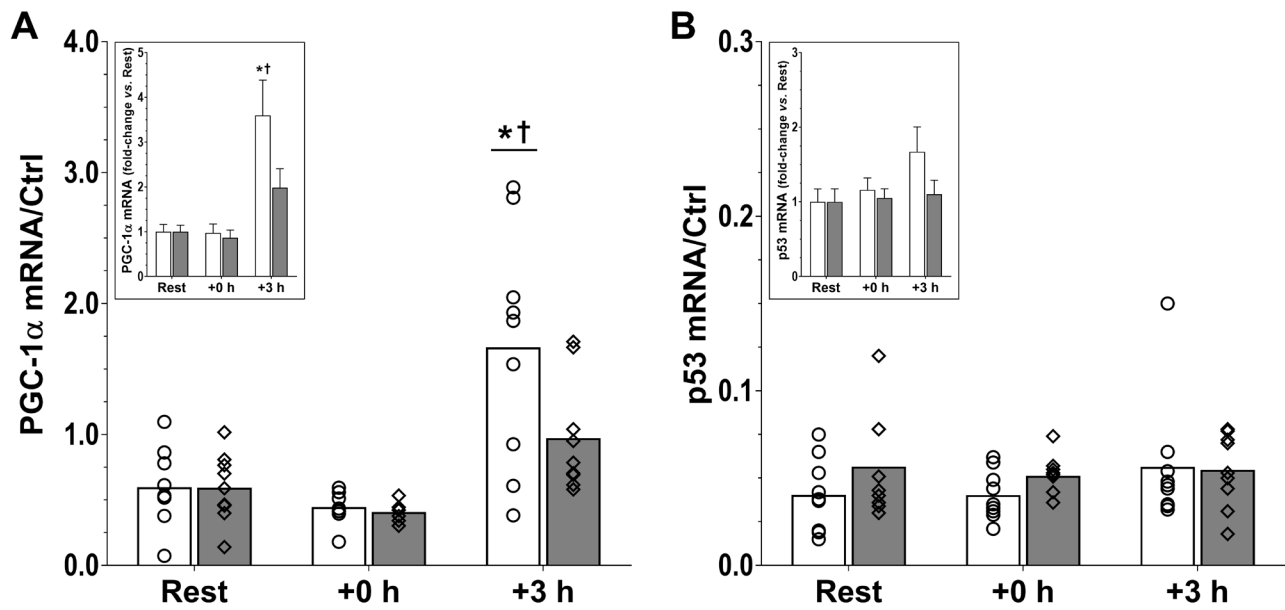

630

631 **Figure 5. Gene expression.** mRNA content of peroxisome proliferator-activated receptor  $\gamma$  coactivator-1 $\alpha$  (PGC-1 $\alpha$ )  
632 (a), and p53 (b) before (Rest), immediately post (+0 h), and 3 h (+3 h) after a single session of high-intensity interval  
633 exercise (HIIE) performed at the same absolute intensity before (Pre-HVT) and after (Post-HVT) 40 sessions of twice-  
634 daily high-volume high-intensity interval training (HVT), in the vastus lateralis muscle of young healthy men (n = 9).  
635 Values are expressed relative to TATA-binding protein (TBP), glyceraldehyde 3-phosphate dehydrogenase (GAPDH),  
636 and  $\beta$ -actin (ACTB) housekeeping genes (Ctrl in the figure). Open circles (Pre-HVT) and open diamonds (Post-HVT)  
637 represent individual values; white (Pre-HVT) and grey (Post-HVT) bars represent mean values. \*  $P < 0.05$  vs. Rest of  
638 the same group; †  $P < 0.05$  vs. same time point of Post-HVT trial. To more clearly depict fold-changes in post-exercise  
639 values from potentially different Rest values in the untrained and trained state, an inset has been added to each main  
640 figure.

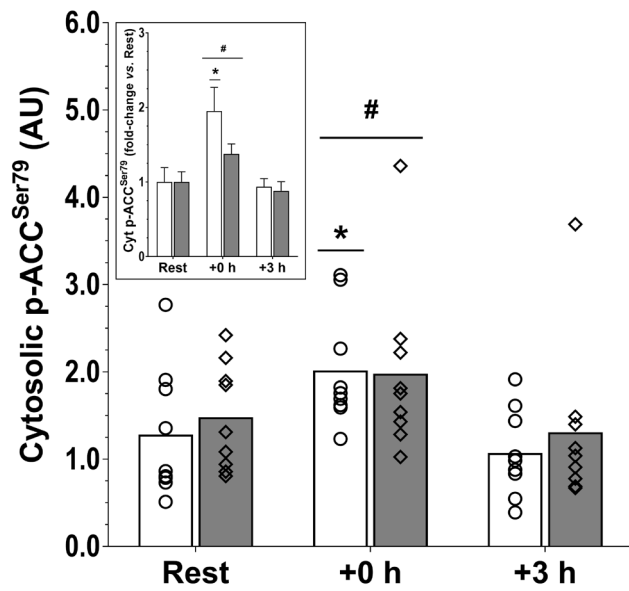

641

642 Figure 6. **Phosphorylation of acetyl-CoA carboxylase (ACC) at serine 79 (p-ACC<sup>Ser79</sup>)**. Protein content of cytosolic  
643 p-ACC<sup>Ser79</sup> before (Rest), immediately post (+0 h), and 3 h (+3 h) after a single session of high-intensity interval  
644 exercise (HIIE) performed at the same absolute intensity before (Pre-HVT) and after (Post-HVT) 40 sessions of twice-  
645 daily high-volume high-intensity interval training (HVT), in the vastus lateralis muscle of young healthy men (n = 9).  
646 Open circles (Pre-HVT) and open diamonds (Post-HVT) represent individual values; white (Pre-HVT) and grey (Post-  
647 HVT) bars represent mean values. # main effect of exercise ( $P < 0.05$ ) vs. Rest; \*  $P < 0.05$  vs. Rest of the same group.  
648 To more clearly depict fold-changes in post-exercise values from potentially different Rest values in the untrained and  
649 trained state, an inset has been added to each main figure.

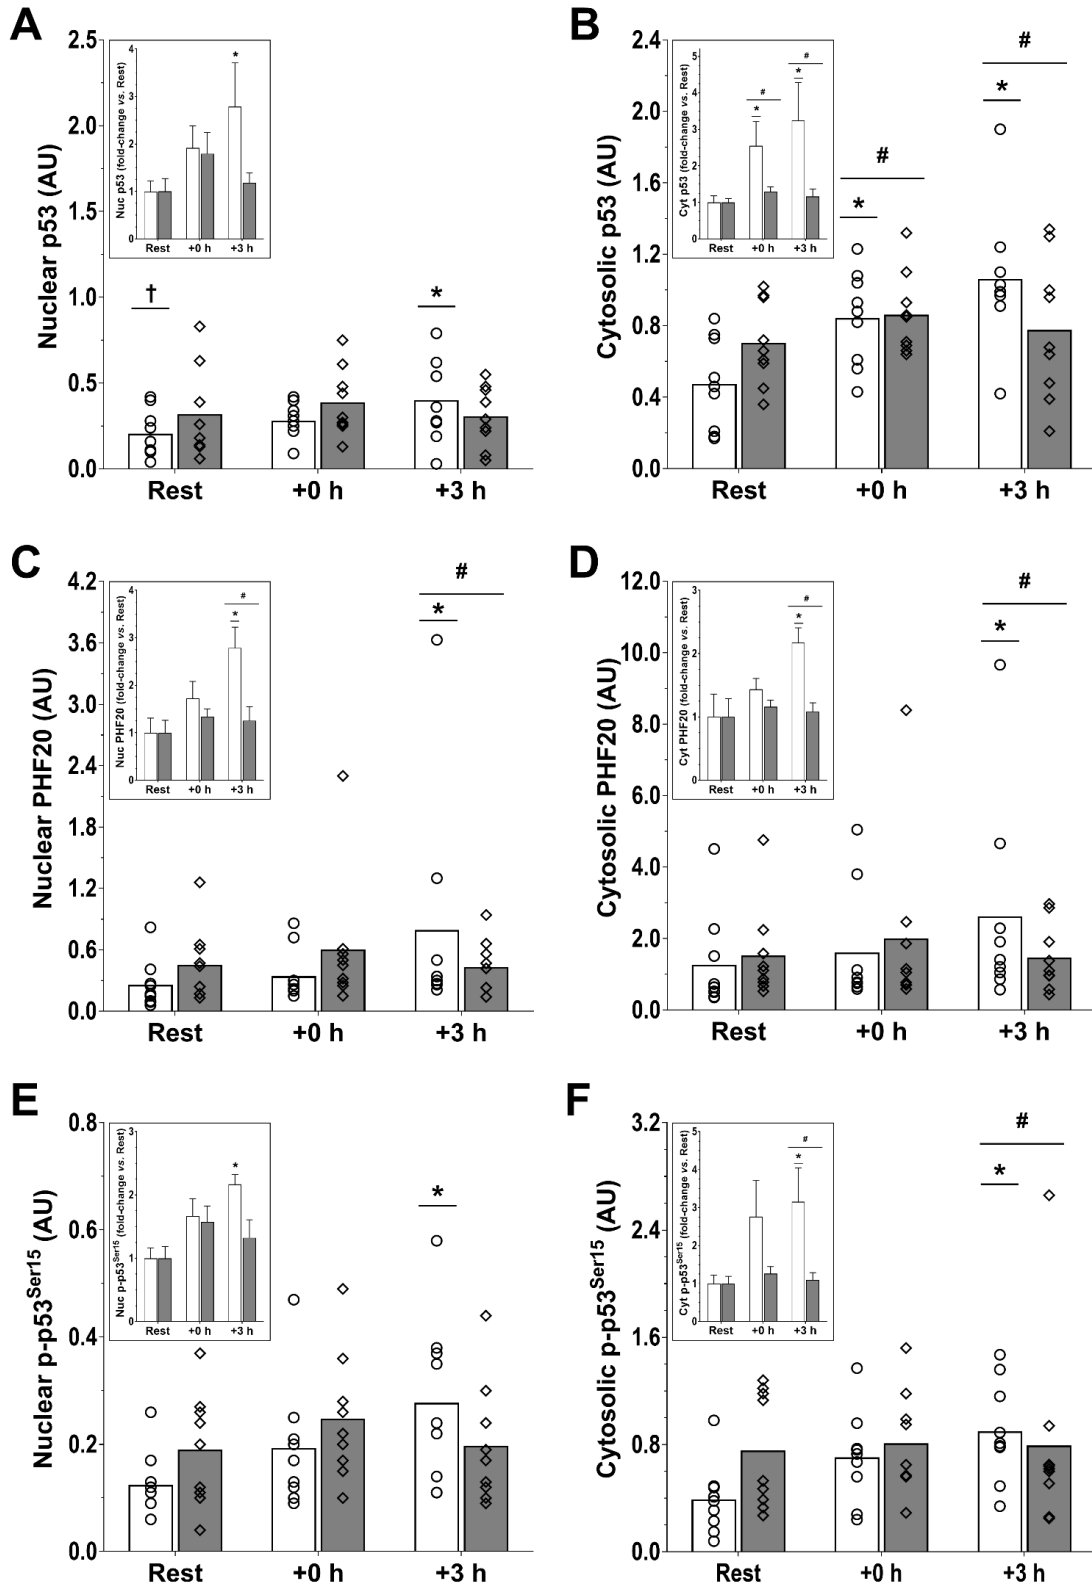



651 **Figure 7. p53 and plant homeodomain finger-containing protein 20 (PHF20) protein.** Protein content of nuclear (a)  
652 and cytosolic (b) p53, of nuclear (c) and cytosolic (d) PHF20, and of nuclear (e) and cytosolic (f) p-p53<sup>Ser15</sup> assessed  
653 before (Rest), immediately post (+0 h), and 3 h (+3 h) after a single session of high-intensity interval exercise (HIIE)  
654 performed at the same absolute intensity before (Pre-HVT) and after (Post-HVT) 40 sessions of twice-daily high-  
655 volume high-intensity interval training (HVT), in the vastus lateralis muscle of young healthy men (n = 9). Open circles  
656 (Pre-HVT) and open diamonds (Post-HVT) represent individual values; white (Pre-HVT) and grey (Post-HVT) bars  
657 represent mean values. # main effect of exercise ( $P < 0.05$ ) vs. Rest; \*  $P < 0.05$  vs. Rest of the same group; †  $P < 0.05$  vs.  
658 same time point of Post-HVT trial. To more clearly depict fold-changes in post-exercise values from potentially  
659 different Rest values in the untrained and trained state, an inset has been added to each main figure (note, significant  
660 differences between trained and untrained values at Rest are not reported in insets as these values are both normalized to  
661 1).
